# Supplementary material
Source: PubMed Central journal article supplement (PMC4456923)
Supplement: supp_tpc.114.131508_tpc131508_Supplemental.pdf [file supp_tpc.114.131508_tpc131508_Supplemental.pdf]

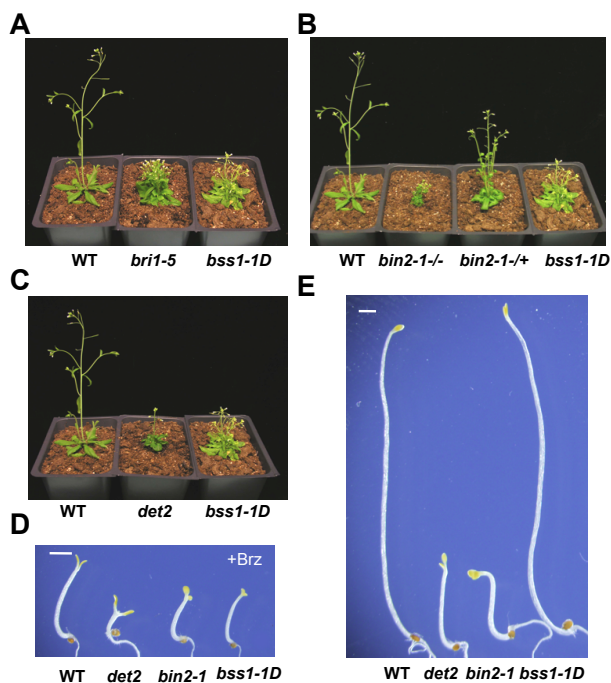

**Supplemental Figure 1.** The phenotype of *bss1-1D* resembles the phenotype of BR-deficient mutants.

**(A-C)** Wild-type (WT) *Arabidopsis*, the *bss1-1D* mutant and BR biosynthesis (*det2*) and signaling (*bri1*, *bin2*) mutants were grown in the soil in long-day conditions for 35 days.

**(D-E)** WT *Arabidopsis* and the *det2*, *bin2-1* and *bss1-1D* mutants were grown on medium containing 3  $\mu$ M Brz (D) and without Brz (E) in the dark for 7 days. Scale bar, 1 mm.

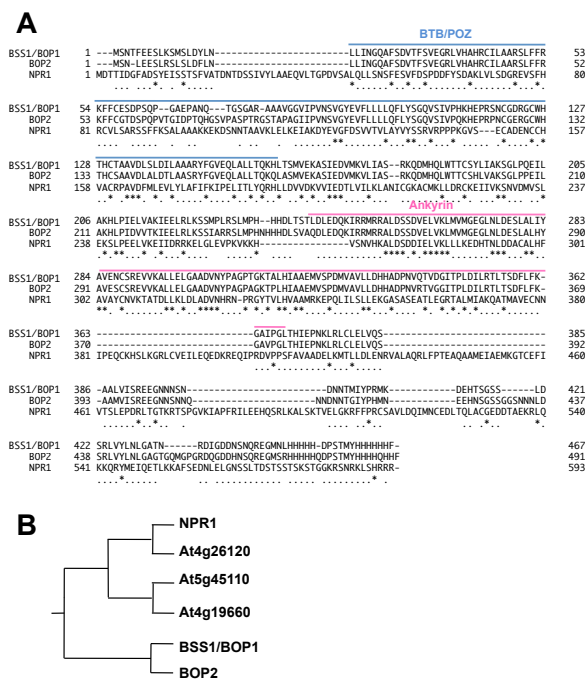

**Supplemental Figure 2.** BSS1 protein encoded by the BOP1 gene.

**(A)** Multiple sequence alignment of the BSS1/BOP1, BOP2 and NPR1 proteins. The alignment was obtained using the COBALT program (Papadopoulos and Agarwala 2007). The BTB/POZ domain and ankyrin repeat region are indicated with blue and pink lines, respectively.

**(B)** Phylogenetic tree for BSS1/BOP1 and homologs.

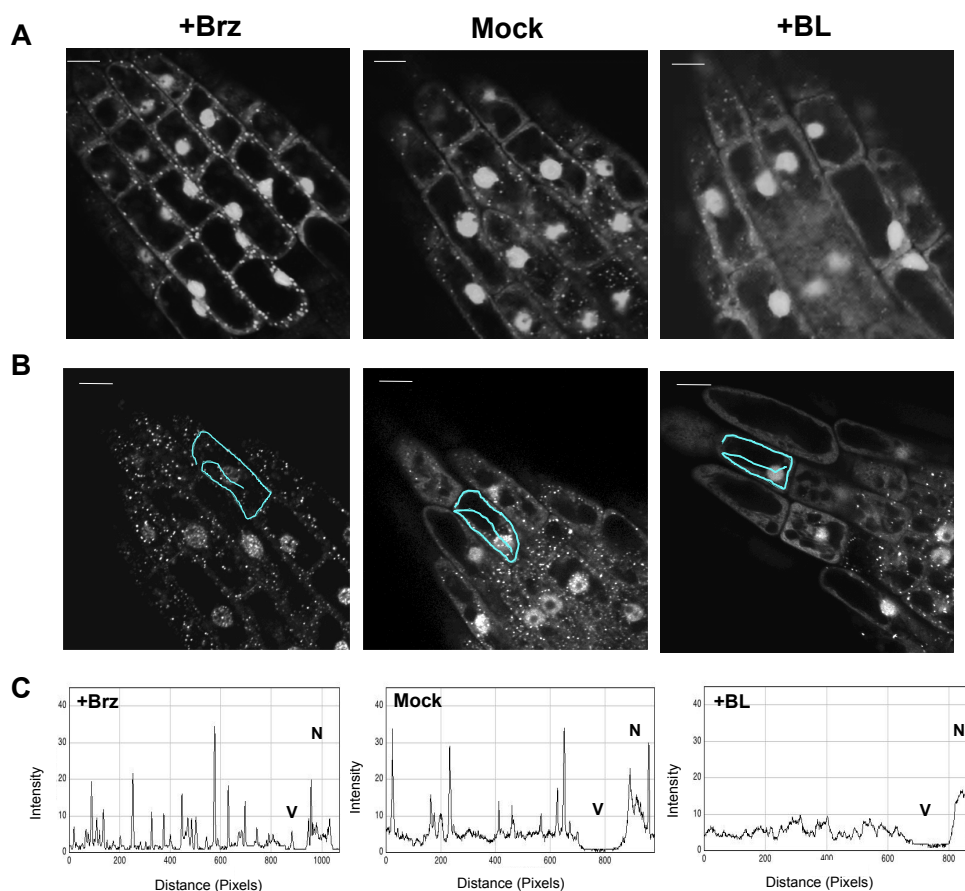

### Supplemental Figure 3. Analysis of BSS1/BOP1-GFP signal intensities

**(A-B)** The root cells of four-day-old BSS1/BOP1-GFP transgenic seedlings were treated with 3  $\mu$ M Brz (+Brz), the same amount of DMSO as mock treatment (Mock) or 100  $\mu$ M BL (+BL) for 15 minutes (A) and 3 h (B). Scale bar, 10  $\mu$ m. Blue lines show the point of analysis of signal intensity in the nucleus, cytoplasm and vacuole by ImageJ software.

**(C)** GFP fluorescence intensity profiles for the cytosol, vacuole (V) and nucleus (N) from the images shown in (B). An image of BSS1/BOP1-GFP in 4-day-old seedlings treated with 3  $\mu$ M Brz (+Brz), DMSO (Mock) or 100 nM BL (+BL) for 3 h. The plot profiles were made using ImageJ software (<http://rsb.info.nih.gov/ij/>).

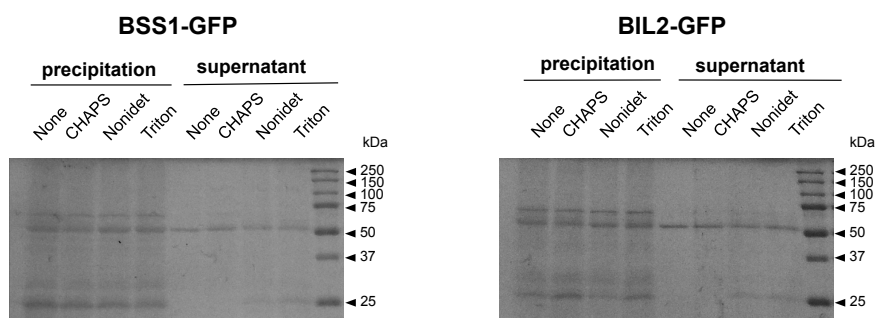

**Supplemental Figure 4.** Loading control for Figure 6E. Same amount of proteins as in Figure 6E were separated in SDS-PAGE gels and stained with Coomassie Brilliant Blue.

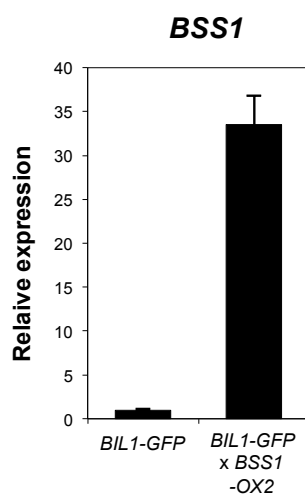

**Supplemental Figure 5.** Analysis of *BSS1/BOP1* expression in *BIL1-GFP-OX* and *BIL1-GFP* and *BSS1/BOP1-OX* used in the observations and measurements shown in Figure 9.

Quantitative RT-PCR analysis of the expression levels of *BSS1/BOP1* in light-grown *BIL1-GFP-OX* and *BIL1-GFP* and *BSS1/BOP1-OX2* used in Figure 9. The results are presented as the mean  $\pm$  s.d. from 4 independent experiments. For qRT-PCR analysis, *ACT2* was used as the internal control.
